# Supplementary material for: Parental Mental Well-Being and Frequency of Adult-Child Nature Visits: The Mediating Roles of Parents’ Perceived Barriers
Source: MDPI journal article supplement (doi:10.3390/ijerph18136814), 2021-06-25
Supplement: s1 [file s1]

## Supplementary material

Supplementary Table S1. Regression coefficients for background variables in mediation model.

|                                       | Lack of competence and logistics |      |                | Lack of time and interest       |      |                | Insecurity and fear             |      |                | Frequency of adult-child nature visits |      |                |
|---------------------------------------|----------------------------------|------|----------------|---------------------------------|------|----------------|---------------------------------|------|----------------|----------------------------------------|------|----------------|
|                                       | Unstandardized coefficients (B)  | SE   | <i>p-value</i> | Unstandardized coefficients (B) | SE   | <i>p-value</i> | Unstandardized coefficients (B) | SE   | <i>p-value</i> | Unstandardized coefficients (B)        | SE   | <i>p-value</i> |
| Child age                             | -0.02                            | 0.01 | <0.01          | 0.02                            | 0.01 | <0.01          | -0.01                           | 0.01 | <0.05          | -0.06                                  | 0.02 | <0.01          |
| Parental educational attainment       | -0.01                            | 0.01 | 0.60           | 0.05                            | 0.01 | <0.01          | -0.02                           | 0.01 | 0.18           | -0.10                                  | 0.04 | <0.05          |
| Parents' perceived economic situation | -0.04                            | 0.01 | <0.01          | -0.03                           | 0.01 | <0.01          | -0.03                           | 0.01 | <0.01          | 0.01                                   | 0.04 | 0.84           |
| Household type <sup>I</sup>           | 0.08                             | 0.03 | <0.01          | 0.03                            | 0.03 | 0.30           | -0.01                           | 0.03 | 0.75           | -0.16                                  | 0.10 | 0.10           |

*Note.* Key and background variables included in same model.

<sup>I</sup> Household type (two-parent household = 1, single-parent household = 2).
